# Supplementary material
Source: publisher figshare collection journal article supplement (https://gsajournals.figshare.com/ndownloader/files/13477382)
Supplement: Supplementary file 1 [file 13477382]

## Sheet: Sheet1
Table S5. Gaps in R6 major chromosome scaffolds
R6	R6_start	R6_end	Contig (this study)	start	end	predicted length (kb)	Real size (bp)	Major Sequences
X	22282924	22314924	X_7	multiple hits		32	NA	TEs
X	22317805	22349805	X_7	multiple hits		32	NA	TEs
X	22354229	22354329	X_7	multiple hits		unsized	NA	TEs
X	23473919	23474019	Contig5	265893	478511	unsized	212618	rDNA repeats and TEs
2L	22420242	22420342	2L_2	1112455	1170393	unsized	57938	TEs
2R	4369	4469	2R_16	multiple hits		unsized	NA	Responder repeats
2R	24427	24527	2R_16	119600	138427	unsized	18827	Responder repeats and TE
2R	416885	422885	2R_16	445134	455426	6	10292	AATATAT repeats
2R	20780708	20780808	2R_21	17099311	17103976	unsized	4665	123-bp complex repeats
3L	5107767	5114767	3L_1	5103779	5110530	7	6751	7kb big tandem duplication from a TE
3L	26404000	26407000	3L_5	33214	34372	3	1158	TEs
3L	26882322	26936122	3L_5	530211	530275	53.8	64	1.688 satellite
3L	27549161	27549261	3L_10	746701	729599	unsized	-17102	a 17kb deletion in this study
3R	2446427	2446527	3R_13	36776	46910	unsized	10134	TEs
3R	2488684	2488784	3R_13	89064	312417	unsized	223353	TEs
3R	2492821	2494721	3R_13	316454	236003	1.9	-80451	*
3R	2498073	2499973	3R_13	232655	321519	1.9	88864	TEs
3R	2515633	2516633	3R_13	326904	333661	1	6757	TEs
3R	2519339	2520339	3R_13	336367	209698	1	-126669	*
3R	2522592	2522692	3R_13	207447	416863	unsized	209416	TEs
3R	2527792	2530092	3R_13	421960	427142	2.3	5182	TEs
3R	2536032	2539432	3R_13	433082	437897	3.4	4815	TEs
3R	4009645	4011645	3R_26	411132	863019	2	451887	TEs
3R	4012025	4012125	3R_26	863398	898876	unsized	35478	AACATAT repeats
4	1200663	1217663	4_2	1202292	1220289	17	17997	AAATTAT simple repeats
*a complex rearrangement between R6 and new assembly
